# Supplementary material for: Nest-site selection and breeding success of passerines in the world’s southernmost forests
Source: PeerJ. 2020 Sep 21;8:e9892. doi: 10.7717/peerj.9892 (PMC7513745; doi:10.7717/peerj.9892)
Supplement: Supplemental Information 2 [file peerj-08-9892-s007.xlsx]

## Sheet: Raw_Data
Nest ID	Species	nest	canopy.cover	canopy.height	understory.cover	understory.height
14MR01	ELAALB	1	90	5	10.1	60
14MR01R	ELAALB	0	1	4	51	320
14RJ08	ELAALB	1	95	6.9	20	130
14RJ08R	ELAALB	0	90	25	46	120
15JW02	ELAALB	1	35	5.2	65	230
15JW02R	ELAALB	0	60	18	1	250
15OB11	ELAALB	1	50	15	5	100
15OB11R	ELAALB	0	70	6	1.5	140
15RJ11	ELAALB	1	90	6	5	90
15RJ11R	ELAALB	0	90	7	0.5	110
15JW01	ELAALB	1	40	5	25	85
15JW01R	ELAALB	0	15	3.5	73.5	120
15RJ10	ELAALB	1	45	3.5	2	100
15RJ10R	ELAALB	0	11	3	35.5	90
15AV01	ELAALB	1	20	10	48	130
15AV01R	ELAALB	0	40	13	15	30
15OB09	ELAALB	1	0	0	72.5	170
15OB09R	ELAALB	0	0	0	51	105
15OB10	ELAALB	1	0	0	42	210
15OB10R	ELAALB	0	70	15	38.5	55
15OB07	ELAALB	1	33	4.1	41	150
15OB07R	ELAALB	0	7	18	96	160
15AS01	ELAALB	1	3	6	33.5	100
15AS01R	ELAALB	0	50	10	9	60
15RJ14	ELAALB	1	25	4.2	52	90
15RJ14R	ELAALB	0	60	5.5	9.5	65
15RJ16	ELAALB	1	10	6	90.5	175
15RJ16R	ELAALB	0	25	6	65	75
15RJ17	ELAALB	1	50	6	81	130
15RJ17R	ELAALB	0	0	0	29	50
15RJ13	ELAALB	1	55	6	27.5	154
15RJ13R	ELAALB	0	40	4.5	8.5	75
15RJ12	ELAALB	1	30	4.5	87.8	150
15RJ12R	ELAALB	0	70	11	11.5	50
16JU03	ELAALB	1	20	2.75	61	100
16JU03R	ELAALB	0	4	2.9	83	135
16RJ16	ELAALB	1	30	3.5	28	97.5
16RJ16R	ELAALB	0	40	4.75	32	125
16JU04	ELAALB	1	25	5.5	65	172
16JU04R	ELAALB	0	20	8.5	73	90
16OB13	ELAALB	1	10	3.25	45	132
16OB13R	ELAALB	0	5	4.5	64	137
16JU06	ELAALB	1	80	4.25	8	145
16JU06R	ELAALB	0	60	4	24	117
15MG01	TURFAL	1	60	30	2	50
15MG01R	TURFAL	0	60	15	1	40
15OB01	TURFAL	1	80	12	10	95
15OB01R	TURFAL	0	95	15	15	90
15RC01	TURFAL	1	0	0	100	100
15RC01R	TURFAL	0	10	6	100	110
Zorzal.NN	TURFAL	1	11	6	27	90
Zorzal.NNR	TURFAL	0	75	10	1	50
15KD01	TURFAL	1	37	19	2	75
15KD01R	TURFAL	0	96	25	2	50
16RJ12	TURFAL	1	2	6	43	120
16RJ12R	TURFAL	0	0	0	10	100
16RJ17	TURFAL	1	75	8	46	110
16RJ17R	TURFAL	0	60	13	33	200
16OB05	TURFAL	1	50	3	72	157
16OB05R	TURFAL	0	32	9	21	95
15RC02	ZONCAP	1	10	4	61	95
15RC02R	ZONCAP	0	75	15	25	110
15YP01	ZONCAP	1	10	3	35	90
15YP01R	ZONCAP	0	30	8	10	50
15RJ01	ZONCAP	1	2	4	45	70
15RJ01R	ZONCAP	0	70	4	0	0
15RJ03	ZONCAP	1	35	5	31	120
15RJ03R	ZONCAP	0	0	0	40	40
15OB02	ZONCAP	1	90	8	26	50
15OB02R	ZONCAP	0	90	8	15	50
15RC10	ZONCAP	1	0	0	14	200
15RC10R	ZONCAP	0	0	0	86	150
15RJ04	ZONCAP	1	0	0	35	150
15RJ04R	ZONCAP	0	0	0	5	70
15OB08	ZONCAP	1	10	10	54	200
15OB08R	ZONCAP	0	10	6	31	150
15RJ06	ZONCAP	1	65	5	5	107
15RJ06R	ZONCAP	0	45	4.5	30	100
15RJ07	ZONCAP	1	5	5.5	65	135
15RJ07R	ZONCAP	0	15	4.1	40	100
15OB05	ZONCAP	1	26	10	15	110
15OB05R	ZONCAP	0	80	12	4	50
15RC07	ZONCAP	1	0	0	80	95
15RC07R	ZONCAP	0	10	3.5	75	100
15RC12	ZONCAP	1	0	0	26	100
15RC12R	ZONCAP	0	0	0	32	120
15OB04	ZONCAP	1	1	3.6	91	100
15OB04R	ZONCAP	0	0	0	2	65
15FS01	ZONCAP	1	0	0	55	120
15FS01R	ZONCAP	0	5	3.3	46	110
15RC13	ZONCAP	1	70	6.8	70	110
15RC13R	ZONCAP	0	60	10	18	100
15RC09	ZONCAP	1	20	12	31	100
15RC09R	ZONCAP	0	40	12	41	210
16OB03	ZONCAP	1	40	4	63	135
16OB03R	ZONCAP	0	0	0	25	70
16RJ10	ZONCAP	1	30	5	100	90
16RJ10R	ZONCAP	0	0	0	72	75
16RJ06	ZONCAP	1	10	4.5	40	55
16RJ06R	ZONCAP	0	70	7	21	45
16RJ08	ZONCAP	1	75	20	25	85
16RJ08R	ZONCAP	0	20	3.5	55	85
16OB11	ZONCAP	1	20	1.32	96	55
16OB11R	ZONCAP	0	5	1.2	47	95
16OB06	ZONCAP	1	15	2.75	48	95
16OB06R	ZONCAP	0	15	2.5	30	85
16OB10	ZONCAP	1	35	12	68	115
16OB10R	ZONCAP	0	10	5	65	150
16OB04	ZONCAP	1	8	3.5	88	160
16OB04R	ZONCAP	0	0	0	44	100
16RJ03	ZONCAP	1	10	9	56	110
16RJ03R	ZONCAP	0	90	10.5	53	120
16OB02	ZONCAP	1	40	18	98	115
16OB02R	ZONCAP	0	30	18	90	145
16JU01	ZONCAP	1	35	3	100	100
16JU01R	ZONCAP	0	45	3.5	85	90
16RJ15	ZONCAP	1	5	3	36	75
16RJ15R	ZONCAP	0	7	4.5	20	68
16RJ13	ZONCAP	1	30	3.75	40	75
16RJ13R	ZONCAP	0	60	5	29	120
16JU05	ZONCAP	1	20	8	75	152
16JU05R	ZONCAP	0	65	6.5	45	137
16RJ04	ZONCAP	1	20	4.75	46	115
16RJ04R	ZONCAP	0	35	5	15	10
16OB03	ZONCAP	1	50	4.5	56	112
16OB03R	ZONCAP	0	0	0	2	70
14RJ09	ANAPAR	1	57	3.5	96	110
14RJ09R	ANAPAR	0	50	10	24	150
15RC08	ANAPAR	1	1	4	25	140
15RC08R	ANAPAR	0	50	6	2	100
15RJ02	ANAPAR	1	5	6	26	150
15RJ02R	ANAPAR	0	80	5	12	80
15RJ05	ANAPAR	1	10	3	56	130
15RJ05R	ANAPAR	0	0	0	96	60
15RC05	ANAPAR	1	0	0	92	160
15RC05R	ANAPAR	0	0	0	10	170
15RJ09	ANAPAR	1	30	6	86	130
15RJ09R	ANAPAR	0	0	0	90	130
15RC06	ANAPAR	1	0	0	56	130
15RC06R	ANAPAR	0	15	13	19	170
16RJ01	ANAPAR	1	75	4.5	62	130
16RJ01R	ANAPAR	0	25	18	45	150
16RJ05	ANAPAR	1	13	9	98	110
16RJ05R	ANAPAR	0	12.5	9	97	110
16RJ02	ANAPAR	1	29	3.5	92	75
16RJ02R	ANAPAR	0	5	3	39	75
16RJ07	ANAPAR	1	10	7	100	168
16RJ07R	ANAPAR	0	12	8	91	150
16RJ09	ANAPAR	1	20	3.35	95	100
16RJ09R	ANAPAR	0	0	0	0	0
16OB19	ANAPAR	1	3	5	50	120
16OB19R	ANAPAR	0	2	5	17	135
16OB18	ANAPAR	1	10	3	81	95
16OB18R	ANAPAR	0	30	13.5	26	78
16OB08	ANAPAR	1	45	7	42	250
16OB08R	ANAPAR	0	35	9.5	12	155
16RJ18	ANAPAR	1	40	3.25	31	98
16RJ18R	ANAPAR	0	5	2.75	62	80
15CB01	PHRYPAT	1	92	15	0	0
15CB01R	PHRYPAT	0	85	15	6	70
15OB13	PHRYPAT	1	15	8.5	23	320
15OB13R	PHRYPAT	0	75	15	0	0
15RJ15	PHRYPAT	1	0	0	60	95
15RJ15R	PHRYPAT	0	0	0	11	70
15RC03	PHRYPAT	1	1	6	97	120
15RC03R	PHRYPAT	0	10	5	18	125
15OB03	PHRYPAT	1	3	5	48	150
15OB03R	PHRYPAT	0	5	7	11	90
15OB06	PHRYPAT	1	5	6.8	95	100
15OB06R	PHRYPAT	0	75	11	31	70
15RC14	PHRYPAT	1	11	5.5	58	140
15RC14R	PHRYPAT	0	0	0	23	80
14RJ03	PHRYPAT	1	50	4	62	100
14RJ03R	PHRYPAT	0	15	5	95	80
16AW01	PHRYPAT	1	5	18	45	110
16AW01R	PHRYPAT	0	28	135	58	53
16OB01	PHRYPAT	1	55	8	91	108
16OB01R	PHRYPAT	0	0	0	46	80
16OB15	PHRYPAT	1	12	8	93	120
16OB15R	PHRYPAT	0	70	10	122	50
16OB14	PHRYPAT	1	10	2.5	47	117
16OB14R	PHRYPAT	0	8	10	23	NA
16RJ14	PHRYPAT	1	10	5	57	127
16RJ14R	PHRYPAT	0	0	0	45	100
16RJ20	PHRYPAT	1	17	6.5	100	72
16RJ20R	PHRYPAT	0	95	10	3	165
16OB12	PHRYPAT	1	0	0	100	190
16OB12R	PHRYPAT	0	50	4.25	93	145
16OB17	PHRYPAT	1	3	3.5	47	170
16OB17R	PHRYPAT	0	0	0	19	110
16RJ11	PHRYPAT	1	5	6	51	97.5
16RJ11R	PHRYPAT	0	25	5.7	14	125

## Sheet: Description of colums
Nest ID	Unique reference number given to a every nest. The paired plot of a given nest is identified with the same nest ID of the nest, plus a "R" at the end.
Species	Code to identify the species. ELAALB: Elaenia albiceps; TURFAL: Turdus falklandii; ZONCAP: Zonotrichia capensis; ANAPAR: Anairetes parulus; PHRPAT: Phrygilus patagonicus.
nest	A variable that indicates wether that plot had a nest (1) or it was a paired plot without a nest (0).
canopy.cover	A variable that describes the percentage of the plot that was covered by canopy,
canopy.height	A variable that describes the averagae height of the canopy at the given plot, measured in meters
understory.cover	A variable that describes the percentage of the plot that was covered by understory
understory.height	A variable that describes the averagae height of the of the understory at the given plot, measured in centemeters
